# Supplementary material
Source: Springer Nature journal article supplement (https://www.springermedizin.de/resource/supplementary/40164_2013_65_MOESM8_ESM.pdf/9687108)

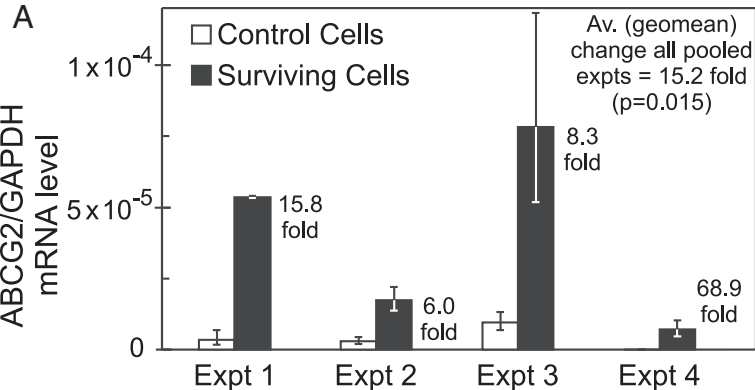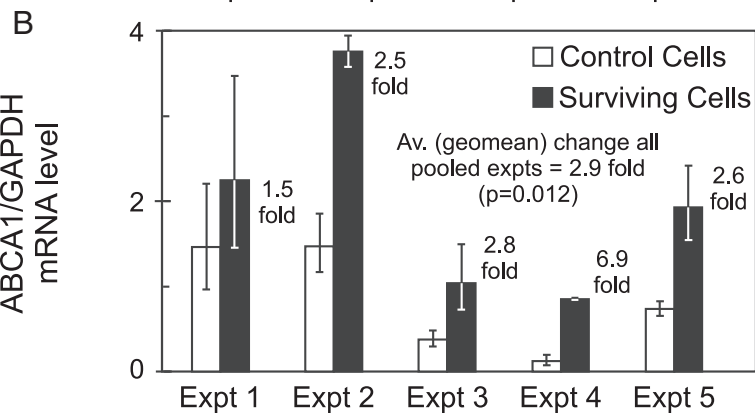

Supplement: MOESM8 [file 9687108]
